# Supplementary material for: Individual and COVID-19-Specific Indicators of Compliance with Mask Use and Social Distancing: The Importance of Norms, Perceived Effectiveness, and State Response
Source: MDPI journal article supplement (doi:10.3390/ijerph18168715), 2021-08-18
Supplement: s1 [file s1]

## **Supplemental File: Assessment Battery**

### **Appendix A – Overview of Measures**

**Appendix B: Demographics** (e.g., age, sex, race, year in school, major, marital status).

American College Personnel Association (2013, December). ACPA standards for demographics questions. Retrieved from <http://www.myacpa.org/sites/default/files/Proposal-Demographic-Questions-and-Responses-2.pdf>

The GenIUSS Group (2014). *Best practices for asking questions to identify transgender and other gender minority respondents on population-based surveys*. J. L. Herman (Ed.) Los Angeles, CA: The Williams Institute.

**Appendix C: Short UPPS-P Impulsive Behavior Scale:**

Cyders, M. A., Littlefield, A. K., Coffey, S., & Karyadi, K. A. (2014). Examination of a short English version of the UPPS-P Impulsive Behavior Scale. *Addictive Behaviors*, 39(9), 1372-1376.

**Appendix D: UPPS-P Impulsive Behavior Scale:**

Lynam, D. R., Smith, G. T., Whiteside, S. P., & Cyders, M. A. The UPPS-P: Assessing five personality pathways to impulsive behavior. West Lafayette, IN: Purdue University, 2006, 10

**Appendix E: Positive and Negative Affect Scale (PANAS)**

Watson, D., Clark, L. A., & Tellegen, A. (1988). Development and validation of brief measures of positive and negative affect: the PANAS scales. *Journal of personality and social psychology*, 54(6), 1063-1070.

**Appendix F: Generalized Anxiety Disorder 7-item (GAD-7) Scale**

Spitzer, R. L., Kroenke, K., Williams, J. B., & Löwe, B. (2006). A brief measure for assessing generalized anxiety disorder: the GAD-7. *Archives of internal medicine*, 166(10), 1092-1097.

**Appendix G: COVID-19 News Items**

COVID-19 Exposure, Perceptions, and Media Usage Questions adapted from the PhenX Toolkit

**Appendix H: COVID-19 Items**

The CoRoNaVirus Health Impact Survey (CRISIS) V0.3: Adult Self-Report Form

The CoRoNaVirus Health Impact Survey (CRISIS) V0.3. Adult Self-Report Follow Up Form:

Current Form: National Institute of Mental Health (NIMH); [Available from:

[https://www.nlm.nih.gov/dr2/CRISIS\\_Adult\\_Self-](https://www.nlm.nih.gov/dr2/CRISIS_Adult_Self-Report_Follow_Up_Current_Form_V0.3.pdf)

[Report\\_Follow\\_Up\\_Current\\_Form\\_V0.3.pdf](https://www.nlm.nih.gov/dr2/CRISIS_Adult_Self-Report_Follow_Up_Current_Form_V0.3.pdf).

## Appendix B: Demographic Questionnaire

Q434 What is your current student/employment status

- ☐ Full-time undergraduate student taking all classes remotely (4)
- ☐ Full-time undergraduate student taking all classes in-person (5)
- ☐ Full-time undergraduate student taking a hybrid of remote and in-person classes (6)
- ☐ Part-time undergraduate student taking all classes remotely (7)
- ☐ Part-time undergraduate student taking all classes in-person (8)
- ☐ Part-time undergraduate student taking a hybrid of remote and in-person classes (9)
- ☐ Graduate student taking all classes remotely (10)
- ☐ Graduate student taking all classes in-person (11)
- ☐ Graduate student taking a hybrid of remote and in-person classes (12)
- ☐ Working full-time, not taking classes (13)
- ☐ Working part-time, not taking classes (14)
- ☐ Other (15) \_\_\_\_\_

C2Res Where did you currently live

- ☐ Campus housing (1)
- ☐ Apartment/house with parent(s) (2)
- ☐ Apartment/house with friend's family (3)
- ☐ Apartment/house with friend(s)/roommate(s)/partner (4)
- ☐ Apartment/house where I live alone (5)
- ☐ Other: please specify (6) \_\_\_\_\_

C1LivingW Who did you live with (check all that apply)

- ☐ Parent(s) (1)
- ☐ Sibling(s) (2)
- ☐ Other family member(s) (3)
- ☐ Friend(s) (4)
- ☐ Significant other (5)
- ☐ No one (6)
- ☐ Other (7) \_\_\_\_\_

-----

C2State What state did you currently live in

▼ Alabama (1) ... I do not reside in the United States (53)

---

Page Break

C2Age How old are you

- ☐ 19 (19)
- ☐ 20 (20)
- ☐ 21 (21)
- ☐ 22 (22)
- ☐ 23 (23)
- ☐ 24 (24)
- ☐ 25 (25)
- ☐ 26 or older (26)

Q436 Are you of Hispanic or Latinx origin?

- ☐ No (1)
  - ☐ Yes (2)
-

Q437 What race/ethnicity do you consider yourself (select all that apply)?

- ☐ American Indian or Alaska Native (1)
  - ☐ Asian (2)
  - ☐ Black or African American (3)
  - ☐ Native Hawaiian or other Pacific Islander (4)
  - ☐ White (5)
  - ☐ Other (6)
- 

Q438 What sex were you assigned at birth, on your original birth certificate

- ☐ Male (1)
- ☐ Female (2)

C2Gender What is your gender identity (check all that apply)

- ☐ Male (1)
  - ☐ Female (2)
  - ☐ Trans male/Trans man (3)
  - ☐ Trans female/Trans woman (4)
  - ☐ Gender queer/Gender non-conforming (5)
  - ☐ Different identity (please state) (6)
- 

Q439 What is your sexual orientation?

- ☐ Straight (1)
- ☐ Gay or lesbian (2)
- ☐ Bisexual (3)
- ☐ Transgender, transsexual, or gender non-conforming (4)

Q440 Student status

- ☐ Full-time (12+ credits) (1)
  - ☐ Part-time (1-11 credits) (2)
-

Q441 Dating/marital status

- ☐ Divorced/separated (1)
- ☐ Married (2)
- ☐ Living with a partner (3)
- ☐ Committed relationship (4)
- ☐ Casual dating relationship (5)
- ☐ single (6)

Q442 Are you a student athlete

- ☐ No (1)
- ☐ Yes, varsity sport (2)
- ☐ Yes, club sport or intramural sport (3)

### **Appendix C: Short UPPS-P**

Q449 INSTRUCTIONS: Below are a number of statements that describe ways in which people act and think. For each statement, please indicate how much you agree or disagree with the statement. Be sure to indicate your agreement for every statement below.



|                                                                                                             | Strongly Agree (1)    | Agree Somewhat (2)    | Disagree Somewhat (3) | Strongly Disagree (4) |
|-------------------------------------------------------------------------------------------------------------|-----------------------|-----------------------|-----------------------|-----------------------|
| I generally like to see things through to the end. (1)                                                      | <input type="radio"/> | <input type="radio"/> | <input type="radio"/> | <input type="radio"/> |
| My thinking is usually careful and purposeful. (2)                                                          | <input type="radio"/> | <input type="radio"/> | <input type="radio"/> | <input type="radio"/> |
| When I am in a great mood I tend to get into situations that could cause me problems. (3)                   | <input type="radio"/> | <input type="radio"/> | <input type="radio"/> | <input type="radio"/> |
| Unfinished tasks really bother me. (4)                                                                      | <input type="radio"/> | <input type="radio"/> | <input type="radio"/> | <input type="radio"/> |
| I like to stop and think things over behavior I do them. (5)                                                | <input type="radio"/> | <input type="radio"/> | <input type="radio"/> | <input type="radio"/> |
| When I feel bad, I will often do things I later regret in order to make myself feel better now. (6)         | <input type="radio"/> | <input type="radio"/> | <input type="radio"/> | <input type="radio"/> |
| Once I get going on something I hate to stop. (7)                                                           | <input type="radio"/> | <input type="radio"/> | <input type="radio"/> | <input type="radio"/> |
| Sometimes when I feel bad, I can't seem to stop what I am doing even though it is making me feel worse. (8) | <input type="radio"/> | <input type="radio"/> | <input type="radio"/> | <input type="radio"/> |
| I quite enjoy taking risks. (9)                                                                             | <input type="radio"/> | <input type="radio"/> | <input type="radio"/> | <input type="radio"/> |

I tend to lose control when I am in a great mood.  
(10)

☐☐☐☐

I finish what I start.  
(11)

☐☐☐☐

I tend to value and follow a rational, “sensible” approach to things. (12)

☐☐☐☐

When I am upset I often act without thinking. (13)

☐☐☐☐

I welcome new and exciting experiences and sensations, even if they are a little frightening and unconventional.  
(14)

☐☐☐☐

When I feel rejected, I will often say things that I later regret. (15)

☐☐☐☐

I would like to learn to fly an airplane.  
(16)

☐☐☐☐

Others are shocked or worried about the things I do when I am feeling very excited. (17)

☐☐☐☐

I would enjoy the sensation of skiing very fast down a high mountain slope. (18)

☐☐☐☐

I usually think carefully before doing anything. (19)

☐☐☐☐

I tend to act without  
thinking when I am  
really excited. (20)

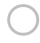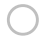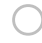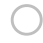

#### Appendix D: UPPS-P

Below are a number of statements that describe ways in which people act and think. For each statement, please indicate how much you agree or disagree with the statement. If you **Agree Strongly** circle **1**, if you **Agree Somewhat** circle **2**, if you **Disagree somewhat** circle **3**, and if you **Disagree Strongly** circle **4**. Be sure to indicate your agreement or disagreement for every statement below. Also, there are questions on the following pages.

|                                                                                                                      | Agree<br>Strongly | Agree<br>Some | Disagree<br>Some | Disagree<br>Strongly |
|----------------------------------------------------------------------------------------------------------------------|-------------------|---------------|------------------|----------------------|
| 3. I generally seek new and exciting experiences and sensations.                                                     | 1                 | 2             | 3                | 4                    |
| 12. I often get involved in things I later wish I could get out of.                                                  | 1                 | 2             | 3                | 4                    |
| 17. When I feel bad, I will often do things I later regret in order to make myself feel better now.                  | 1                 | 2             | 3                | 4                    |
| 22. Sometimes when I feel bad, I can't seem to stop what I am doing even though it is making me feel worse.          | 1                 | 2             | 3                | 4                    |
| 23. I quite enjoy taking risks.                                                                                      | 1                 | 2             | 3                | 4                    |
| 25. When I am really ecstatic, I tend to get out of control.                                                         | 1                 | 2             | 3                | 4                    |
| 29. When I am upset I often act without thinking.                                                                    | 1                 | 2             | 3                | 4                    |
| 31. I welcome new and exciting experiences and sensations, even if they are a little frightening and unconventional. | 1                 | 2             | 3                | 4                    |
| 34. When I feel rejected, I will often say things that I later regret.                                               | 1                 | 2             | 3                | 4                    |
| 35. Others are shocked or worried about the things I do when I am feeling very excited.                              | 1                 | 2             | 3                | 4                    |
| 36. I would like to learn to fly an airplane.                                                                        | 1                 | 2             | 3                | 4                    |
| 44. I often make matters worse because I act without thinking when I am upset.                                       | 1                 | 2             | 3                | 4                    |
| 50. In the heat of an argument, I will often say things that I later regret.                                         | 1                 | 2             | 3                | 4                    |
| 52. I tend to act without thinking when I am really excited.                                                         | 1                 | 2             | 3                | 4                    |
| 54. When I am really happy, I often find myself in situations that I normally wouldn't be comfortable with.          | 1                 | 2             | 3                | 4                    |
| 57. When I am very happy, I feel like it is ok to give in to cravings or overindulge.                                | 1                 | 2             | 3                | 4                    |
| 58. Sometimes I do impulsive things that I later regret.                                                             | 1                 | 2             | 3                | 4                    |
| 59. I am surprised at the things I do while in a great mood.                                                         | 1                 | 2             | 3                | 4                    |

### Appendix E: Positive and Negative Affect Scale for Children (PANAS-C)

This scale consists of a number of words that describe different feelings and emotions. Indicate to what extent you have felt this way **during the past two weeks**

|                          | Very slightly or<br>not at all (1) | A little (2)          | Moderately (3)        | Quite a bit (4)       | Extremely (5)         |
|--------------------------|------------------------------------|-----------------------|-----------------------|-----------------------|-----------------------|
| Sad (Sad)                | <input type="radio"/>              | <input type="radio"/> | <input type="radio"/> | <input type="radio"/> | <input type="radio"/> |
| Upset (Upset)            | <input type="radio"/>              | <input type="radio"/> | <input type="radio"/> | <input type="radio"/> | <input type="radio"/> |
| Scared (Scare)           | <input type="radio"/>              | <input type="radio"/> | <input type="radio"/> | <input type="radio"/> | <input type="radio"/> |
| Miserable<br>(Miserable) | <input type="radio"/>              | <input type="radio"/> | <input type="radio"/> | <input type="radio"/> | <input type="radio"/> |
| Cheerful<br>(Cheerful)   | <input type="radio"/>              | <input type="radio"/> | <input type="radio"/> | <input type="radio"/> | <input type="radio"/> |
| Proud (Proud)            | <input type="radio"/>              | <input type="radio"/> | <input type="radio"/> | <input type="radio"/> | <input type="radio"/> |
| Joyful (Joyful)          | <input type="radio"/>              | <input type="radio"/> | <input type="radio"/> | <input type="radio"/> | <input type="radio"/> |
| Lonely (Lonely)          | <input type="radio"/>              | <input type="radio"/> | <input type="radio"/> | <input type="radio"/> | <input type="radio"/> |
| Delighted<br>(Delighted) | <input type="radio"/>              | <input type="radio"/> | <input type="radio"/> | <input type="radio"/> | <input type="radio"/> |
| Lively (Lively)          | <input type="radio"/>              | <input type="radio"/> | <input type="radio"/> | <input type="radio"/> | <input type="radio"/> |

## Appendix F: GAD-7

C2GAD7 **Over the last 2 weeks**, how often have you been bothered by the following problems?

|                                                                     | Not at all (0)        | Several days (1)      | Over half the days<br>(2) | Nearly every day (3)  |
|---------------------------------------------------------------------|-----------------------|-----------------------|---------------------------|-----------------------|
| Feeling nervous,<br>anxious, or on edge<br>(Nervous)                | <input type="radio"/> | <input type="radio"/> | <input type="radio"/>     | <input type="radio"/> |
| Not being able to<br>stop or control<br>worrying (Worrying)         | <input type="radio"/> | <input type="radio"/> | <input type="radio"/>     | <input type="radio"/> |
| Worrying too much<br>about different<br>things (Worry alot)         | <input type="radio"/> | <input type="radio"/> | <input type="radio"/>     | <input type="radio"/> |
| Trouble relaxing<br>(No relax)                                      | <input type="radio"/> | <input type="radio"/> | <input type="radio"/>     | <input type="radio"/> |
| Being so restless<br>that it's hard to sit<br>still (Restless)      | <input type="radio"/> | <input type="radio"/> | <input type="radio"/>     | <input type="radio"/> |
| Becoming easily<br>annoyed or irritable<br>(Annoyed)                | <input type="radio"/> | <input type="radio"/> | <input type="radio"/>     | <input type="radio"/> |
| Feeling afraid as if<br>something awful<br>might happen<br>(Afraid) | <input type="radio"/> | <input type="radio"/> | <input type="radio"/>     | <input type="radio"/> |

## Appendix G: COVID-19 News Items

[illegible]

## Appendix H: COVID-19 Items

C2SocDis In the **last 2 weeks**, how much have you been social distancing?

- ☐ Not at all (1)
- ☐ (2)
- ☐ (3)
- ☐ (4)
- ☐ (5)
- ☐ (6)
- ☐ (7)
- ☐ (8)
- ☐ (9)
- ☐ At all times (10)



C2PercepBehav1

[illegible]
